# Supplementary material
Source: PubMed Central journal article supplement (PMC7054813)
Supplement: mmc1.pdf [file mmc1.pdf]

**YMTHE, Volume 28**

**Supplemental Information**

**Adenovirus-Antibody Complexes  
Contributed to Lethal Systemic  
Inflammation in a Gene Therapy Trial**

**Suryanarayan Somanathan, Roberto Calcedo, and James M. Wilson**

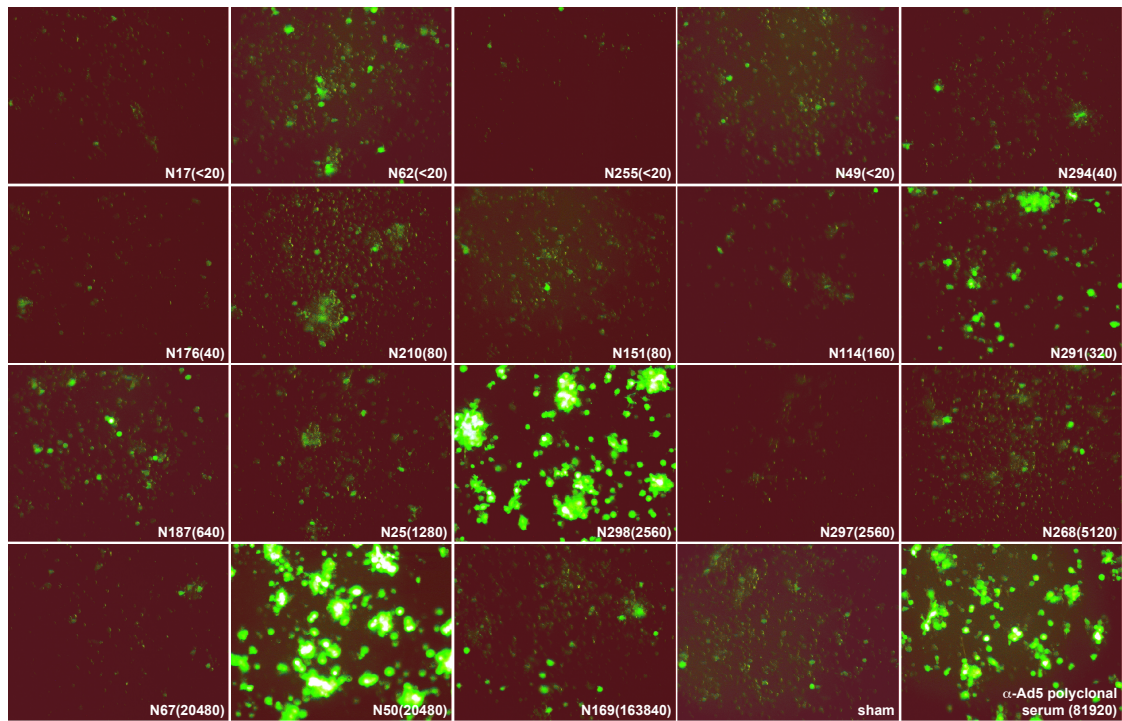

**Figure S1. Pre-existing NAb levels do not correlate with enhancement of DC transduction, see Table 1.** Human serum from individuals with a range of NAb titers were pre-complexed with Ad5-expressing GFP before being added to cells. We imaged the cells 48 h later with an inverted fluorescent microscope equipped with a digital camera. Each panel shows the serum identification numbers and the levels of NAb titer (within brackets).

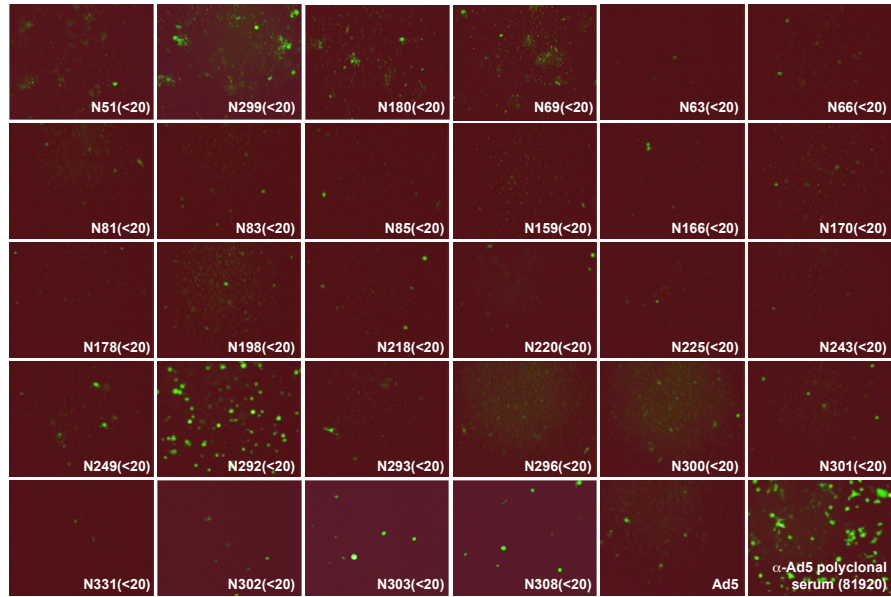

**Figure S2. Screening of naïve human serum for enhancement of DC transduction, see Table 1.** Human sera lacking NABs (titers <20) were screened for enhancement of DC transduction by Ad5. We imaged cells 48 h later using an inverted fluorescent microscope equipped with a digital camera. The numbers inside each panel show the serum identification number and the levels of NAb titer (within brackets).

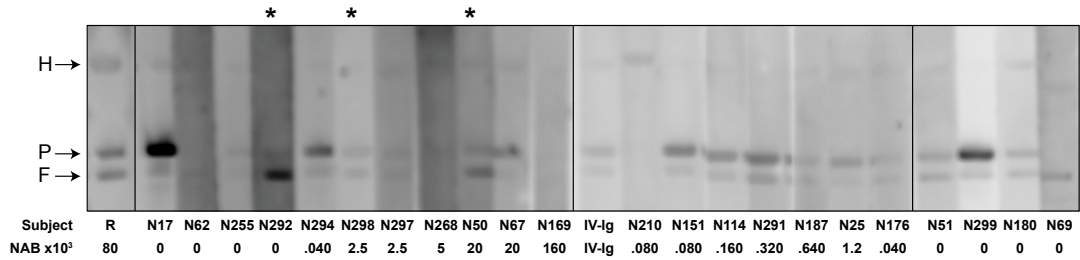

**Figure S3. Immunoblotting of serum samples from healthy donors, see Table 1.** Ad5 proteins were resolved on a 4–12% polyacrylamide gel and probed with serum from healthy donors. Serum sample identification numbers and the NAb titer are provided below the gel. Arrows indicate Ad5 hexon (H), penton (P), or fiber (F) bands. Reactivity with rabbit antiserum (R) is also shown on the blot. Digital images of blots performed under similar conditions were spliced together to generate the composite image. Vertical lines separate the different experiments. (\*) Indicates serum samples that enhance transduction.



**Supplemental Table 1. Activation of Human DCs by Whole Blood from Human Subjects.**

| Analyte                       | Donor | Cells | Ad5  | B1   | B2   | B3   | B4   | B5   | B6   | 019  |
|-------------------------------|-------|-------|------|------|------|------|------|------|------|------|
| <b>GFP (MFI)</b>              | 1     | 1     | 8    |      | 58   |      |      |      | 41   | 147  |
|                               | 2     | 1     | 22   | 83   | 68   | 83   | 51   | 49   | 82   | 158  |
|                               | 3     | 1     | 18   |      | 73   |      |      |      | 82   | 177  |
|                               | 4     | 1     | 38   | 107  | 65   | 102  | 113  | 91   | 106  | 132  |
| <b>CD80<br/>(Fold Change)</b> | 1     | 1     | 1.7  |      | 2.5  |      |      |      | 2.4  | 2.5  |
|                               | 2     | 1     | 2.4  | 1.7  | 3.4  | 2.3  | 2.1  | 1.5  | 2.3  | 4.6  |
|                               | 3     | 1     | 1.4  | 1.6  | 1.9  |      |      | 1.6  | 1.6  | 2.5  |
|                               | 4     | 1     | 1.6  | 1.6  | 1.6  | 1.3  | 1.3  | 1.4  | 1.1  | 2.6  |
| <b>IL-6<br/>(pg/ml)</b>       | 1     | 205   | 335  |      | 675  |      |      |      | 730  | 926  |
|                               | 2     | 149   | 1338 | 1425 | 1435 | 1649 | 1893 | 1924 | 1861 | 2513 |
|                               | 3     | 0     | 204  | 181  | 245  |      |      | 160  | 185  | 1690 |
|                               | 4     | 0     | 587  | 680  | 338  | 833  | 1103 | 829  | 1246 | 1558 |
